# Supplementary material
Source: PubMed Central journal article supplement (PMC11664956)
Supplement: NIHPP2023.11.09.566412v2-supplement-1.pdf [file NIHPP2023.11.09.566412v2-supplement-1.pdf]

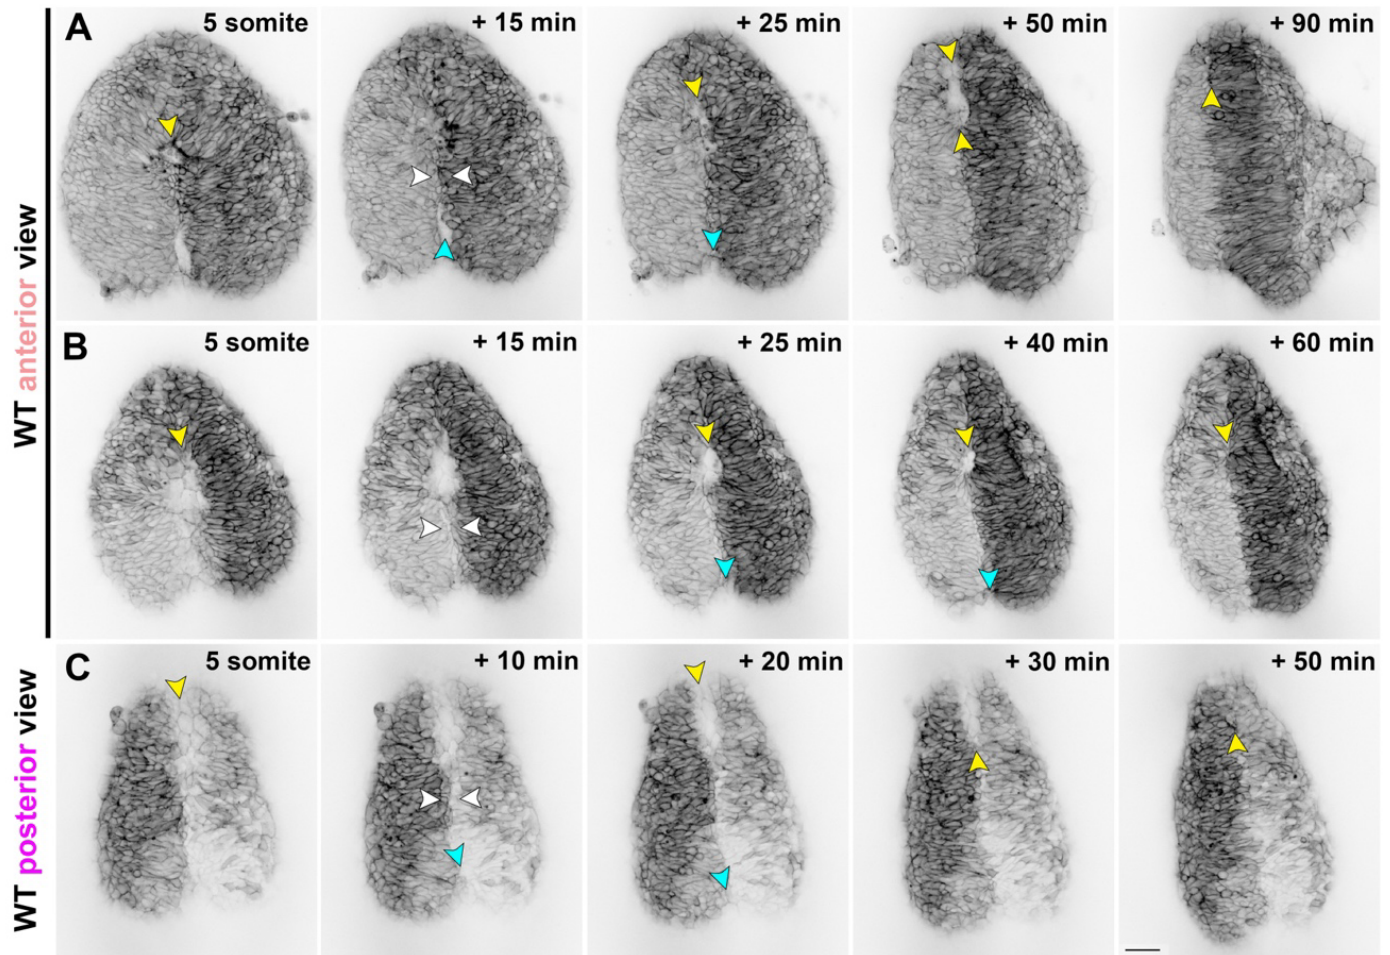

**Supplemental Figure 1. Live imaging reveals neural fold fusion dynamics in live WT embryos.**

**A-C)** Still frames from time-lapse series of anterior neural tube development in WT or *tri* sibling embryos expressing membrane GFP or mCherry beginning at the 5 somite stage, viewed dorsally from more anterior (A-B) or posterior (C) positions. Yellow arrowheads indicate the anterior edge of the neural groove and eventually the eye-shaped opening. White arrowheads indicate the pinch point at which the bilateral neural folds make contact. Cyan arrowheads indicate the posterior opening that zippers closed in the posterior direction from the pinch point. Anterior is up in all images, scale bar = 50  $\mu$ m.

196  
197  
198  
199  
200  
201  
202  
203

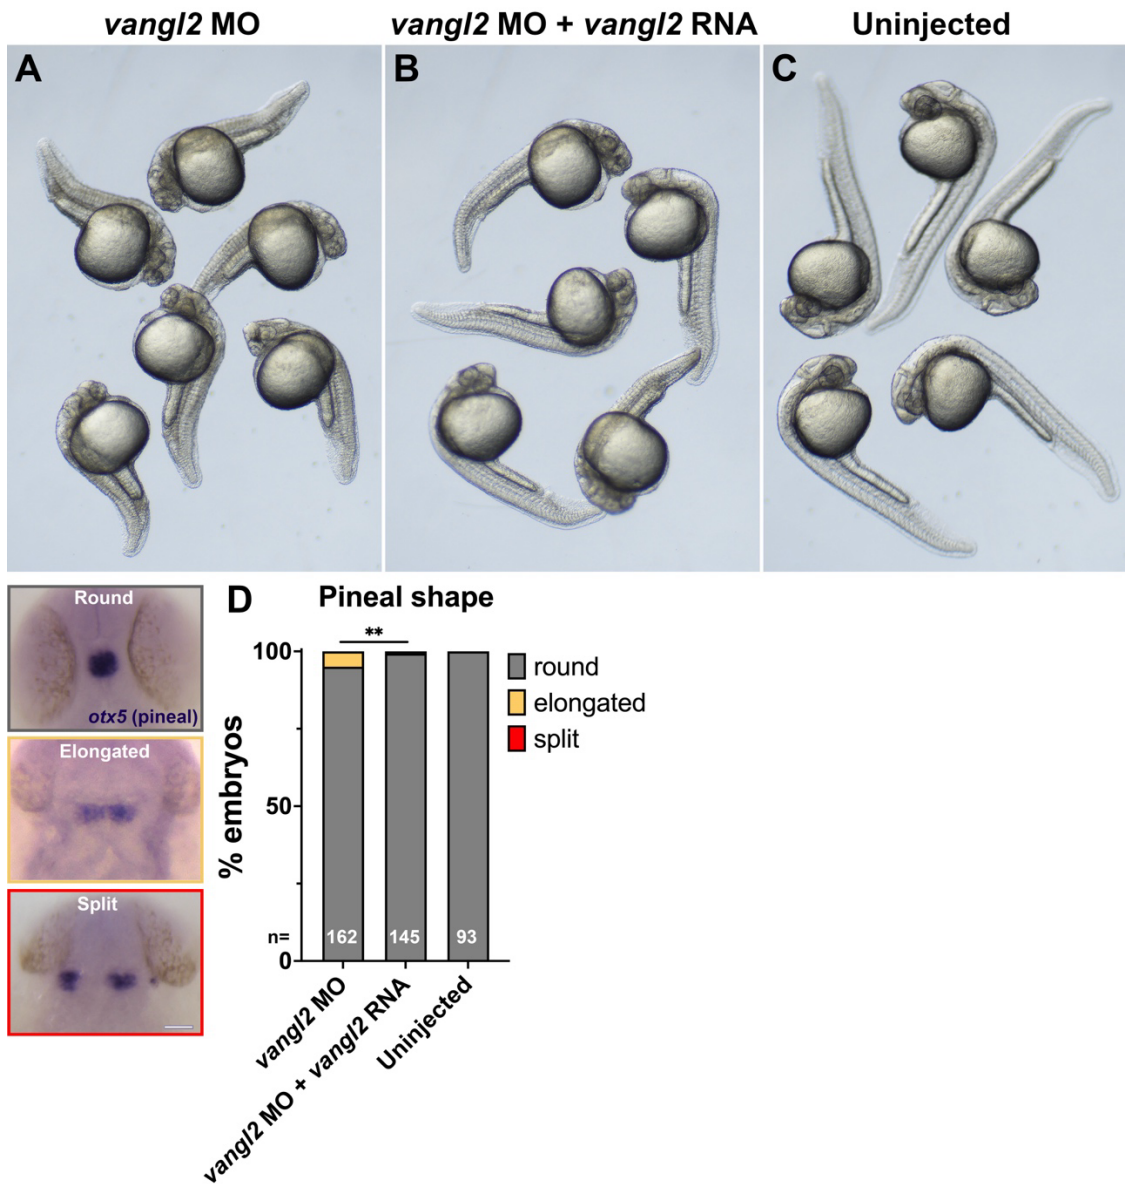

204  
205  
206  
207  
208  
209  
210  
211

**Supplemental Figure 2. *vangl2* mRNA largely rescues *vangl2* morpholino day 1 phenotypes.**

**A-C** Live embryos at approximately 28 hpf injected at the 1-cell stage with 2 ng *vangl2* morpholino (A), 2 ng *vangl2* morpholino + 10 pg *vangl2* mRNA lacking the MO-binding site (B), or uninjected siblings. Images are representative of 3 independent trials. **D** Classification of pineal shape in 28 hpf control, *vangl2* morphant, and rescued morphant embryos WISH stained for *otx5*. n values indicate the number of embryos of each condition measured from 3 independent trials. \*\*p=0.0015, Fisher's exact test.

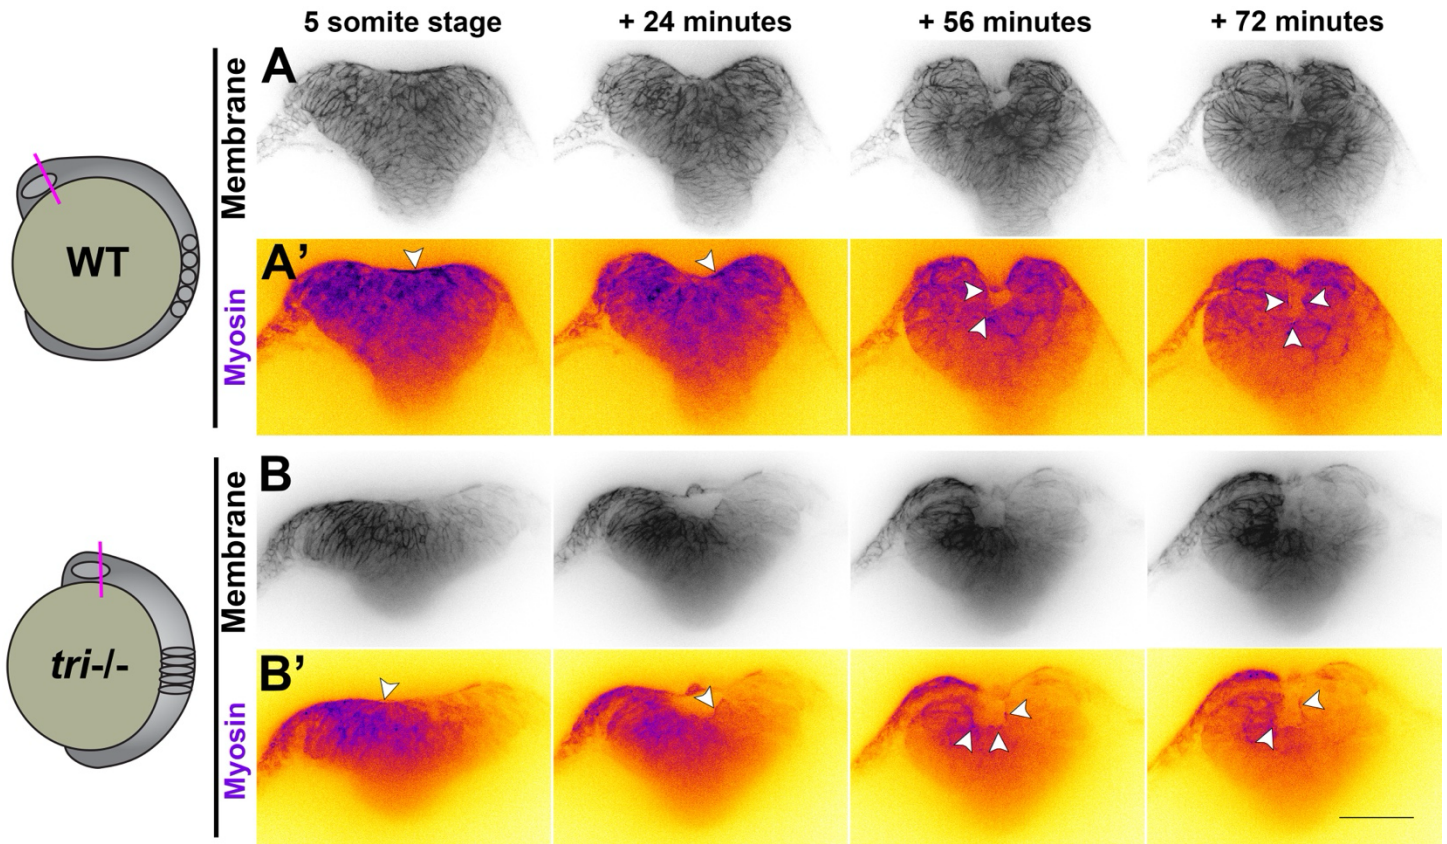

306  
307  
308  
309 **Supplemental Figure 3. Myosin accumulates apically within the neural groove of WT and *vangl2/ tri-/-***  
310 **mutant embryos.**

311 **A-B')** Still frames from time-lapse series of neural fold fusion in WT (A) and *tri-/-* mutant (B) embryos  
312 expressing membrane mCherry (A-B, black) and Sf9-mNeon (A'-B', inverted Fire look up table) beginning at  
313 the 5-somite stage, viewed in transverse optical section through the posterior region of the forebrain.  
314 Arrowheads indicate Myosin localization to the apical surfaces of cells comprising the neural groove. Each  
315 image series is a single Z plane from a confocal stack representative of 4 sibling and 4 mutant Sf9-expressing  
316 embryos. Dorsal is up in all images, scale bar = 100  $\mu$ m.



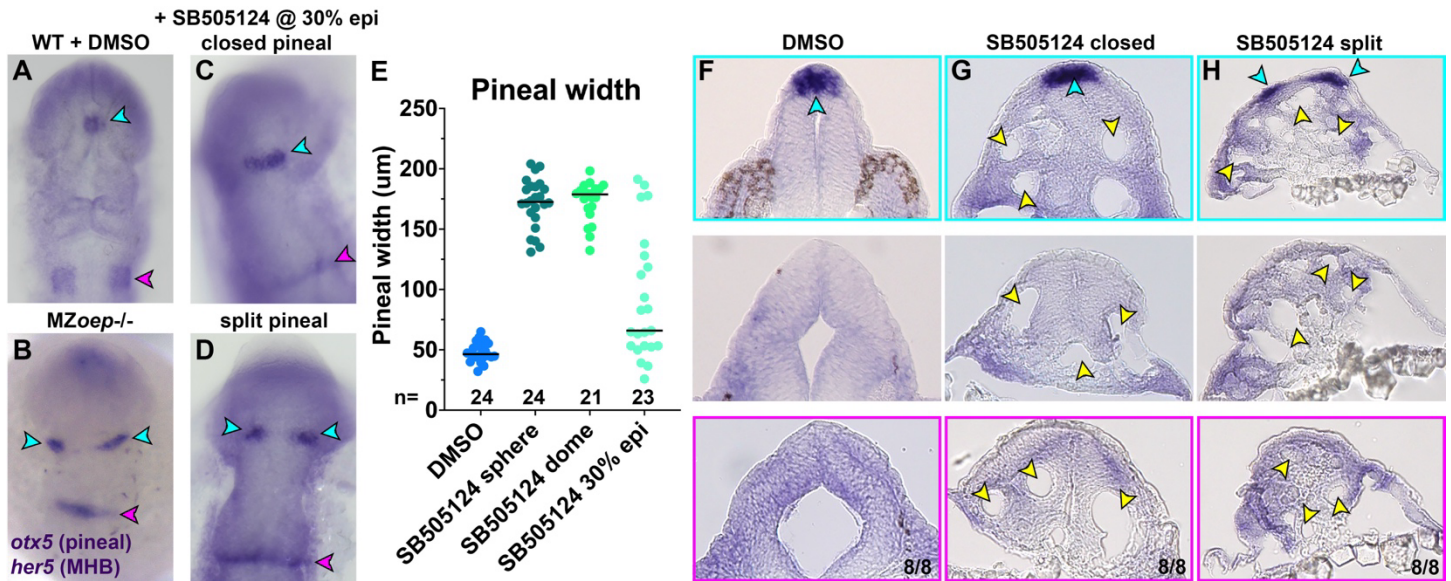

### Supplemental Figure 4. Distinct neural tube morphologies underlie split pineal phenotypes in Nodal deficient embryos.

**A-D**) Representative images of the anterior neural tube in DMSO-treated WT (**A**), MZoep<sup>-/-</sup>, or SB505124-treated (**C-D**) embryos at 28 hpf WISH stained for *otx5* and *her5*, viewed dorsally. Cyan arrowheads indicate pineal precursors, magenta arrowheads indicate the MHB. **E**) Width of pineal precursor domains in embryos of the conditions indicated, measured from *otx5* WISH at 28 hpf (as shown in **A-D**). Each dot represents a single embryo, black bars are median values. **F-H**) Transverse histological sections through the anterior neural tube at the level of the epithalamus (top panels), midbrain (middle panels), and MHB (bottom panels) in 28 hpf embryos of the conditions indicated. Cyan arrowheads indicate pineal precursors stained by *otx5* WISH. Yellow arrowheads indicate ectopic lumens in a Swiss cheese-like pattern. Fractions indicate the number of embryos with the depicted phenotype over the total number of embryos examined for each condition. Anterior is up in (**A-D**), dorsal is up in (**F-H**).



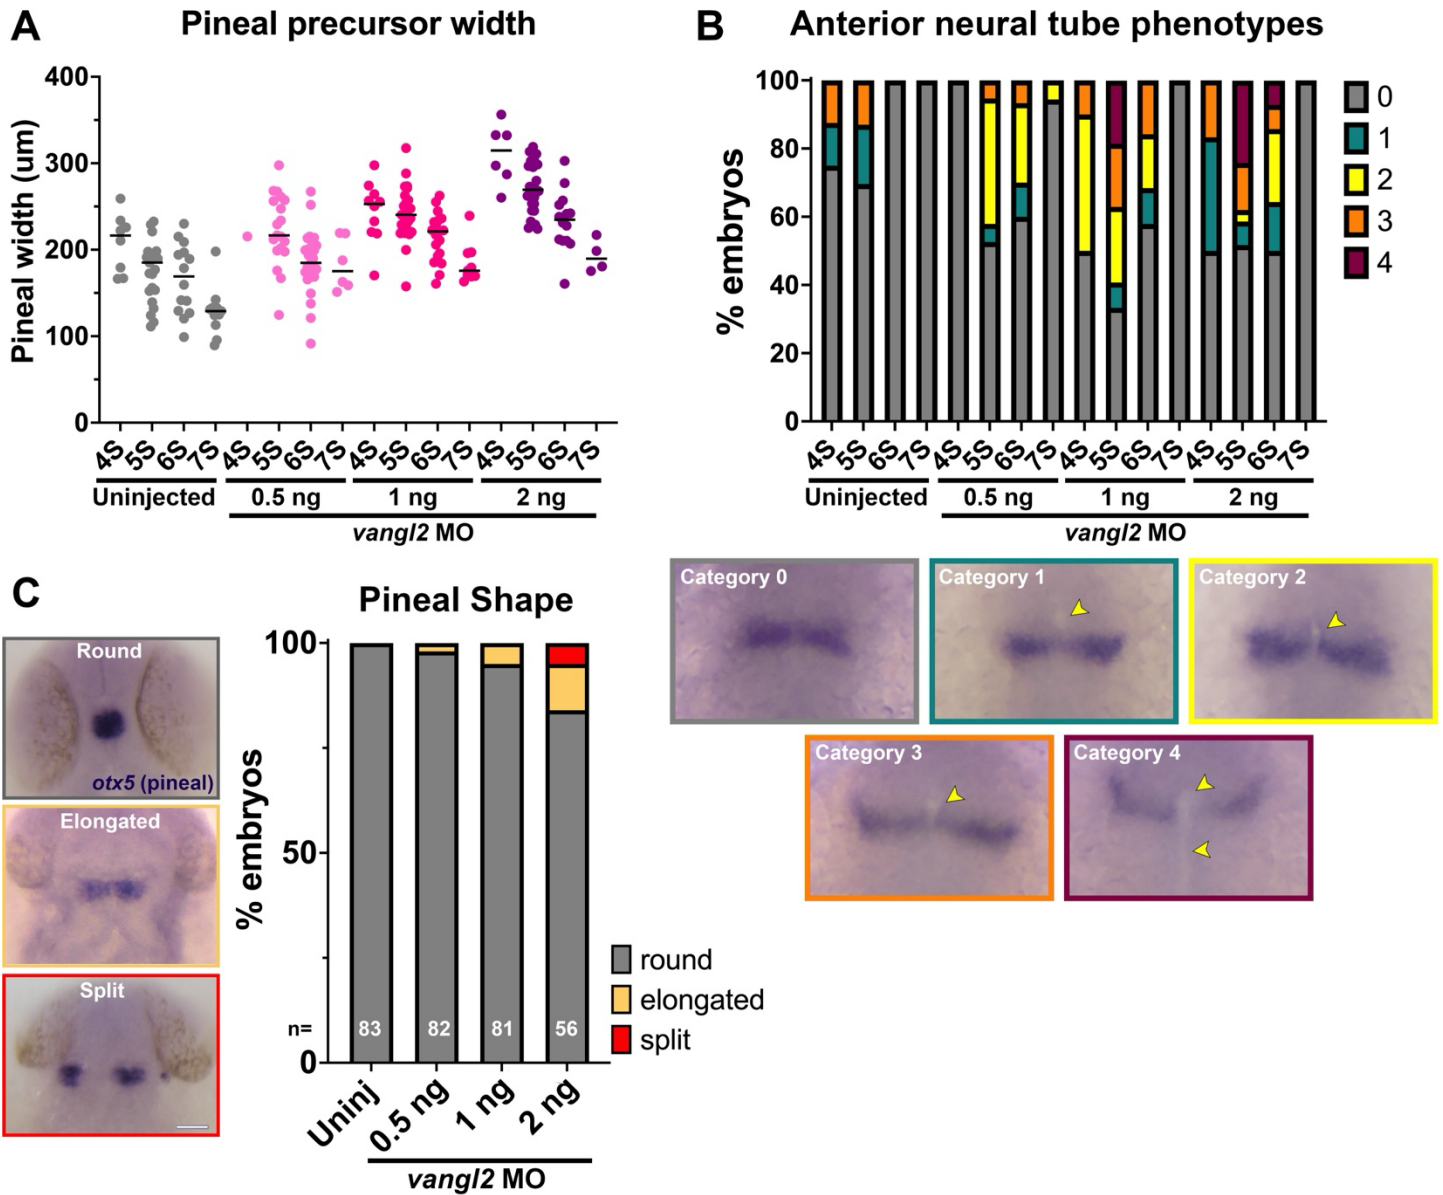

**Supplemental Figure 5. Severity of neural tube phenotypes increases with dose of *vangl2* MO.**

**A)** Width of pineal precursor domains in embryos injected with increasing doses of *vangl2* morpholino and uninjected controls at the stages indicated. Each dot represents a single embryo from 3 independent trials, black bars are median values. **B)** Percentage of embryos injected with each dose of *vangl2* morpholino at the stages indicated exhibiting the categories of anterior neural tube phenotypes shown below. **C)** Classification of pineal shape in 28 hpf control and *vangl2* MO-injected embryos WISH stained for *otx5*. n values indicate the number of embryos of each condition measured from 3 independent trials. \*\*\*p=0.0004, Fisher's exact test. Anterior is up in all images.

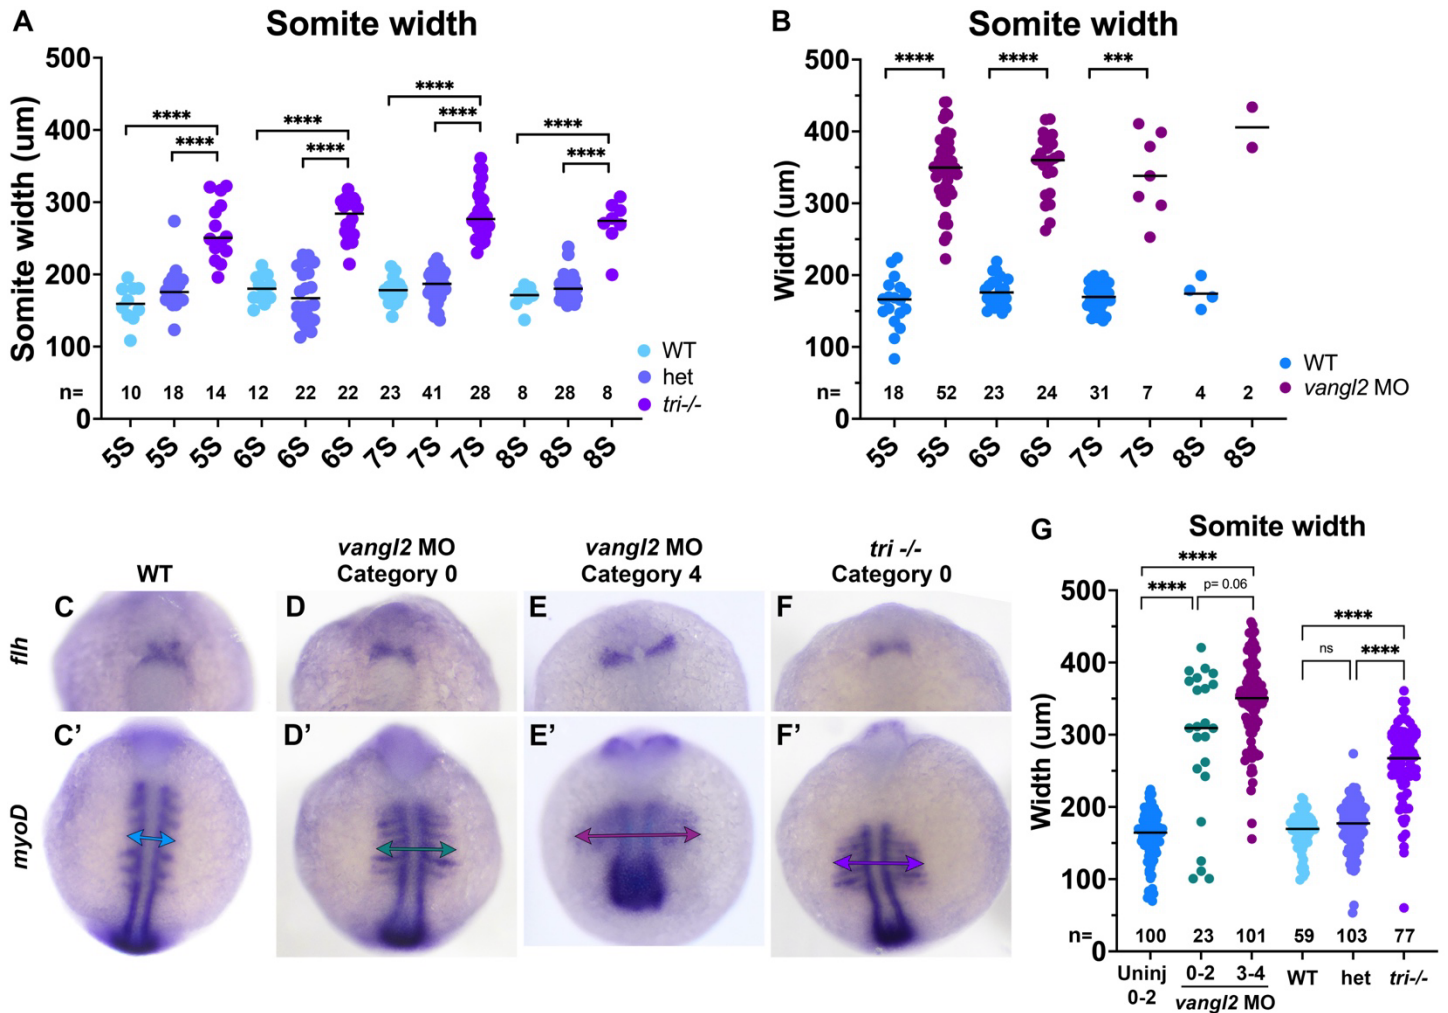

**Supplemental Figure 6. Anterior neural plate phenotypes are correlated with somite width.**

**A-B)** Width of *myoD*<sup>+</sup> somites in *tri*<sup>+/-</sup> incross (A) and *vangl2* morphant and control (B) embryos at the stages indicated. \*\*\*\**p*<0.0001, Welch's ANOVA with Dunnett's multiple comparisons (A), \*\*\*\**p*<0.0001, \*\*\**p*=0.0002, multiple T-tests with Welch's correction (B). **C-F')** Representative images of pineal precursors (*flh* WISH) and somites/adaxial cells (*myoD* WISH) in embryos of the condition and with the category of neural plate phenotype indicated at the 7-somite stage. Double arrows indicate somite width. **G)** Somite width (as shown in C'-F') in embryos of the conditions indicated at 3-7 somite stages, including *vangl2* morphant embryos with category 0-2 (teal) or category 3-4 (burgundy) neural tube phenotypes. Each dot represents a single embryo, black bars are median values. \*\*\*\**p*<0.0001, Kruskal-Wallis test with Dunn's multiple comparisons. *n* values indicate the number of embryos of each stage/condition measured from 3 independent trials. Anterior is up in all images.

613  
614  
615  
616  
617  
618  
619  
620  
621  
622  
623  
624  
625  
626  
627  
628  
629  
630  
631  
632  
633  
634  
635  
636  
637  
638  
639  
640  
641  
642  
643  
644  
645  
646  
647  
648  
649  
650  
651  
652  
653  
654  
655  
656  
657  
658  
659  
660  
661  
662  
663

## Supplemental video legends

**Supp. video 1:** Posterior view of neural groove formation in the forebrain region of a wild-type zebrafish embryo labeled with membrane-GFP. Movie begins at approximately the 4 somite stage and each frame = 5 minutes. Video shows a single Z plane of a 3D confocal time series.

**Supp. video 2:** Anterior view of neural fold fusion in the forebrain region of a wild-type zebrafish embryo labeled with membrane-GFP. Movie begins at the 4-5 somite stage and each frame = 5 minutes. Video shows a single Z plane of a 3D confocal time series.

**Supp. video 3:** Anterior view of neural groove formation in the forebrain region of a wild-type zebrafish embryo labeled with membrane-mCherry and the Sf9-mNeon Myosin reporter. Movie begins at approximately 3 somite stage and each frame = 5 minutes. The left and right panels show a single Z plane at deeper and more superficial positions in the Z-stack, respectively.

**Supp. video 4:** Anterior view of neural fold fusion in the forebrain region of a wild-type zebrafish embryo labeled membrane-mCherry and the Sf9-mNeon Myosin reporter. Movie begins at the 4-5 somite stage and each frame = 5 minutes. Video shows a single Z plane of a 3D confocal time series.

**Supp. video 5:** Neural fold fusion in the forebrain region of a wild-type zebrafish embryo labeled with membrane-GFP. Movie begins at the 6-7 somite stage and each frame = 5 minutes. Video shows a single Z plane of a 3D confocal time series.

**Supp. video 6:** Posterior view of neural groove formation in the forebrain region of a *tri*<sup>-/-</sup> mutant zebrafish embryo labeled with membrane-mCherry. Movie begins at the 6-7 stage and each frame = 5 minutes. Video shows a single Z plane of a 3D confocal time series.

**Supp. video 7:** Posterior view of neural fold fusion in the forebrain region of a *tri*<sup>-/-</sup> mutant zebrafish embryo labeled membrane-mCherry and the Sf9-mNeon Myosin reporter. Movie begins at the 6-7 somite stage and each frame = 5 minutes. Video shows a single Z plane of a 3D confocal time series.

**Supp. video 8:** Neural fold fusion in the forebrain region of a *vangl2* morphant zebrafish embryo labeled with membrane-GFP. Movie begins at the 6-7 somite stage and each frame = 5 minutes. Video shows a single Z plane of a 3D confocal time series.

**Supp. video 9:** Optical transverse section through the posterior forebrain region of a wild-type zebrafish embryo labeled with membrane-GFP. Movie begins at the 4 somite stage and each frame = 5 minutes. Video shows a single Z plane of a 3D confocal time series.



664  
665  
666  
667  
668  
669  
670  
671  
672  
673  
674  
675  
676  
677  
678  
679  
680  
681  
682  
683  
684  
685  
686  
687  
688  
689  
690  
691  
692  
693  
694  
695  
696  
697  
698  
699  
700  
701  
702  
703  
704  
705  
706  
707  
708  
709  
710  
711  
712  
713  
714  
715  
716  
717  
718  
719

**Supp. video 10:** Optical transverse section through the posterior forebrain region of a *tri*<sup>-/-</sup> mutant zebrafish embryo labeled with membrane-GFP. Movie begins at the 4 somite stage and each frame = 5 minutes. Video shows a single Z plane of a 3D confocal time series.

**Supp. video 11:** Optical transverse section through the posterior forebrain region of a *vangl2* morphant zebrafish embryo labeled with membrane-GFP. Movie begins at the 4 somite stage and each frame = 5 minutes. Video shows a single Z plane of a 3D confocal time series.
